# Supplementary material
Source: HighWire-hosted journal article supplement (https://dmd.aspetjournals.org/highwire/filestream/80127/field_highwire_adjunct_files/0/1116_supp_data.pdf)
Supplement: 1116_supp_data.pdf [file 1116_supp_data.pdf]

## **Drug Metabolism and Disposition**

**DMD-AR-2022-001116**

### **Supplemental Materials**

**Preclinical metabolism and disposition of TP0473292, a novel oral prodrug of the potent metabotropic glutamate 2/3 receptor antagonist TP0178894 for the treatment of depression**

Shoko Inatani, Motoki Ochi, Kohnosuke Kinoshita, Jun-ichi Yamaguchi, and Hiromi Endo

Drug Metabolism and Pharmacokinetics, Drug Safety and Pharmacokinetics Laboratories, Research Headquarters, Taisho Pharmaceutical Co., Ltd., Saitama, Japan

**Supplemental Table S1. Overview of experimental conditions for liquid chromatography-tandem mass spectrometry (LC-MS/MS), liquid chromatography-mass spectrometry (LC-MS), and a high-performance liquid chromatograph equipped with a radiochemical flow detector (Radio-HPLC).**

Conditions

**For PAMPA, plasma protein binding study, hydrolytic studies in tissue S9 fractions and sera, reaction phenotyping study, pharmacokinetic study of TP0178894 in monkeys, and tissue distribution study in rats (LC-MS/MS)**

**A** [Column] Shim-pack XR-ODS (2.2  $\mu$ m, 30 mm  $\times$  3.0 mm I.D.; Shimadzu, Kyoto, Japan). Column temperature: 50°C.  
 [Mobile phase] (A) 0.1% v/v formic acid and (B) acetonitrile. Flow rate: 1.3 mL/min.  
 [Detection] TripleQuad™ 5500, TripleQuad™ 6500 or API4000™ (AB Sciex, Framingham, MA) with the TurboIonSpray ionization mode in the negative ion detection mode. TP0473292 (*m/z* 532→179) and [<sup>2</sup>H<sub>4</sub>] TP0473292<sup>a</sup> (*m/z* 536→179), TP0178894 (*m/z* 326→136) and [<sup>2</sup>H<sub>4</sub>] TP0178894<sup>a</sup> (*m/z* 330→136), TP0178894 (*m/z* 326→92) and TP0181164<sup>b</sup> (*m/z* 376→136) (only for tissue distribution study in rats).

**For metabolic profiling of [<sup>3</sup>H]TP0473292 in hepatocytes (Radio-HPLC and LC-MS)**

**B** [Column] Sunfire™ C18 (5  $\mu$ m, 150 mm  $\times$  4.6 mm I.D.; Waters, Milford, MA). Column temperature: 40°C.  
 [Mobile phase] (A) 10 mM ammonium acetate and (B) acetonitrile. Flow rate: 1.0 mL/min.  
 [Detection] Radiomatic 625TR (PerkinElmer, Waltham, MA) with liquid scintillator (Flo-Scint™ II, PerkinElmer) at 3 mL/min. Orbitrap Elite (Thermo Fisher Scientific, Waltham, MA) with the heated electrospray ionization mode in the negative ion detection mode.

**For chemical stability study of acyl glucuronide (LC-MS/MS)**

**C** [Column] Shim-pack XR-ODS (2.2  $\mu$ m, 30 mm  $\times$  3.0 mm I.D.). Column temperature: 50°C.  
 [Mobile phase] (A) 1 mM ammonium acetate (pH 5.0) and (B) acetonitrile. Flow rate: 1.3 mL/min.  
 [Detection] TripleQuad™ 5500 (AB Sciex) with the TurboIonSpray ionization mode in the negative ion detection mode. Adamantane carboxylic acid acyl glucuronide (*m/z* 355→179, *m/z* 355→337). Ibuprofen acyl glucuronide (*m/z* 381→205, *m/z* 381→363). Diclofenac acyl glucuronide (*m/z* 470→294, *m/z* 470→452).

**For pharmacokinetic analysis of TP0473292 and TP0178894 in rats and pharmacokinetic analysis of TP0473292 in monkeys (LC-MS/MS)**

**D** [Column] Atlantis T3 (3  $\mu$ m, 50 mm  $\times$  4.6 mm I.D.; Waters). Column temperature: 40°C.  
 [Mobile phase] (A) 0.01% v/v ammonium acetate and (B) acetonitrile. Flow rate: 1.0 mL/min.  
 [Detection] TripleQuad™ 5500 (AB Sciex) with the TurboIonSpray ionization mode in the negative ion detection mode. TP0473292 (*m/z* 532→254) and [<sup>2</sup>H<sub>4</sub>] TP0473292<sup>a</sup> (*m/z* 536→254), TP0178894 (*m/z* 326→136) and [<sup>2</sup>H<sub>4</sub>] TP0178894<sup>a</sup> (*m/z* 330→136), ACA (*m/z* 179→179) and [<sup>2</sup>H<sub>15</sub>] ACA<sup>a</sup> (*m/z* 194→194), ACA-AG (*m/z* 355→179) and [<sup>2</sup>H<sub>15</sub>] ACA-AG<sup>a</sup> (*m/z* 370→194).

ACA, adamantane carboxylic acid; ACA-AG, adamantane-1-carboxylic acid acyl glucuronide

<sup>a</sup>Internal standard

<sup>b</sup>Structural analog of TP0178894 used as an internal standard

**Supplemental Table S2. LC-MS data and proposed product ions of TP0473292, TP0178894, ACA, and ACA-AG observed in the 1-hour incubation mixture of rat, monkey, and human cryopreserved hepatocytes with TP0473292.**

| Metabolite            | Retention time (min) | [M+H] <sup>+</sup> | Characteristic product ions (m/z) | Description of the product ions                                                                                                   | Samples |
|-----------------------|----------------------|--------------------|-----------------------------------|-----------------------------------------------------------------------------------------------------------------------------------|---------|
| Unchanged (TP0473292) | 47.27                | 532                | 179<br>254                        | loss of C <sub>17</sub> H <sub>17</sub> O <sub>5</sub> F <sub>2</sub><br>loss of C <sub>14</sub> H <sub>11</sub> O <sub>5</sub> F | R       |
| TP0178894             | 13.94                | 326                | 136<br>262<br>282                 | loss of C <sub>8</sub> H <sub>8</sub> O <sub>3</sub> F <sub>2</sub><br>loss of CHO <sub>2</sub> F<br>loss of CO <sub>2</sub>      | R, M, H |
| ACA                   | 27.86                | 179                | -                                 | Fragment ion was not observed in a MS <sup>2</sup> spectrum                                                                       | R, M, H |
| ACA-AG                | 24.60                | 355                | 113<br>179                        | loss of C <sub>12</sub> H <sub>18</sub> O <sub>5</sub><br>loss of C <sub>6</sub> H <sub>8</sub> O <sub>6</sub>                    | R, M, H |

R: incubation mixture of rat hepatocytes with TP0473292

M: incubation mixture of monkey hepatocytes with TP0473292

H: incubation mixture of human hepatocytes with TP0473292

**Supplemental Table S3. Inhibitory effect of TP0473292, TP0178894, ACA and ACA-AG on the specific activities of cytochrome P450 (CYP) isoforms in human liver microsome in both reversible and time-dependent manner**

| CYP isoform | Probe substrate | Reversible inhibition <sup>a</sup> (%) at 10 μM |           |      |        | Time-dependent inhibition <sup>b</sup> (%) at 10 μM |           |       |        |
|-------------|-----------------|-------------------------------------------------|-----------|------|--------|-----------------------------------------------------|-----------|-------|--------|
|             |                 | TP0473292                                       | TP0178894 | ACA  | ACA-AG | TP0473292                                           | TP0178894 | ACA   | ACA-AG |
| CYP1A2      | Phenacetin      | 7.6                                             | 8.3       | 7.9  | 4.0    | -0.7                                                | -4.9      | -15.6 | 8.7    |
| CYP2B6      | Bupropion       | -7.5                                            | 6.9       | 8.3  | 11.7   | 1.7                                                 | 1.1       | -1.2  | 1.3    |
| CYP2C8      | Amodiaquine     | 5.3                                             | 0.7       | -2.5 | 1.4    | -2.9                                                | -3.2      | 7.3   | -1.3   |
| CYP2C9      | Diclofenac      | 12.1                                            | 15.1      | 12.9 | 5.6    | -5.0                                                | -0.7      | -5.1  | 3.2    |
| CYP2C19     | (S)-Mephenytoin | 5.0                                             | 5.0       | 8.3  | 1.7    | -2.6                                                | -11.5     | -4.4  | -9.5   |
| CYP2D6      | Bufuralol       | 1.1                                             | -3.7      | 0.3  | -4.0   | -2.1                                                | -2.5      | -1.0  | 0.0    |
| CYP3A       | Midazolam       | 2.9                                             | 3.6       | 2.9  | 3.6    | -5.3                                                | 2.1       | -5.8  | -2.0   |
| CYP3A       | Testosterone    | 1.1                                             | 5.7       | 3.1  | -1.9   | 0.8                                                 | 6.7       | 2.5   | -1.3   |

<sup>a</sup>Each value represents the mean of triplicate determinations.

<sup>b</sup>Time-dependent inhibition was indicated as the difference in the percent inhibition between with and without the first 30-min incubation with test compound.

**Supplemental Table S4. Effect of TP0473292 and TP0178894 on CYP1A2, CYP2B6, and CYP3A4 mRNA expression levels at 10  $\mu$ M in the primary cultured cryopreserved human hepatocytes.**

| Hepatocyte Lot number | Compound                      | Fold change of mRNA expression level |        |        |
|-----------------------|-------------------------------|--------------------------------------|--------|--------|
|                       |                               | CYP1A2                               | CYP2B6 | CYP3A4 |
| 1                     | TP0473292                     | 0.903                                | 0.800  | 0.891  |
|                       | TP0178894                     | 0.866                                | 0.855  | 1.20   |
|                       | Positive control <sup>a</sup> | > 16.7                               | 9.90   | 171    |
| 2                     | TP0473292                     | 0.901                                | 0.774  | 0.772  |
|                       | TP0178894                     | 0.877                                | 0.749  | 1.13   |
|                       | Positive control <sup>a</sup> | > 11.5                               | 22.3   | > 102  |
| 3                     | TP0473292                     | 0.916                                | 0.846  | 1.01   |
|                       | TP0178894                     | 0.998                                | 0.903  | 0.929  |
|                       | Positive control <sup>a</sup> | 9.81                                 | 8.22   | 43.5   |

Data are presented as the mean of triplicate determinations.

TP0473292 and TP0178894 did not show detectable toxicity to the cultured human hepatocytes at 10  $\mu$ M.

<sup>a</sup>Positive controls are omeprazole<sup>b</sup> (50  $\mu$ M) for CYP1A2, phenobarbital<sup>b</sup> (1000  $\mu$ M) for CYP2B6, and rifampicin<sup>c</sup> (10  $\mu$ M) for CYP3A4.

<sup>b</sup>Supplied by FUJIFILM Wako Pure Chemical Corporation (Osaka, Japan)

<sup>c</sup>Supplied by Merck KGaA (Darmstadt, Germany)

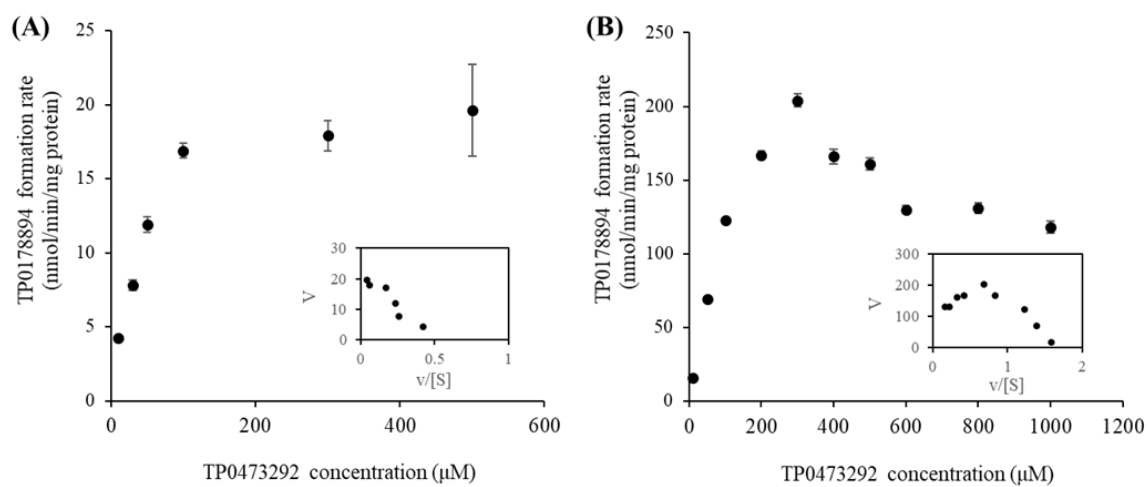

### Supplemental Figure S1

TP0178894 formation rate versus TP0473292 concentration plots in the intestinal (A) and liver (B) S9 fractions. Data are presented as the mean  $\pm$  S.D. of triplicate determinations.

Insets show Eadie-Hofstee plots.
